# Supplementary material for: Comparing the visual outcome, visual quality, and satisfaction among three types of multi-focal intraocular lenses
Source: PubMed Central journal article supplement (PMC7481789; doi:10.1038/s41598-020-69318-y), 2020-09-09
Supplement: 41598_2020_69318_MOESM3_ESM.pdf [file 41598_2020_69318_MOESM3_ESM.pdf]

**Comparing the visual outcome, visual quality, and satisfaction among three types of multi-focal intraocular lenses**

Dong Won Paik, MD<sup>1\*</sup>, Jun Sang Park, MD<sup>2,3\*</sup>,

Chan Min Yang, MD<sup>1</sup>, Dong Hui Lim, MD, PhD<sup>1\*\*</sup>, Tae-Young Chung, MD, PhD<sup>1,2\*\*</sup>

<sup>1</sup>Department of Ophthalmology, Samsung Medical Center,

Sungkyunkwan University School of Medicine

<sup>2</sup>The Graduate School Sungkyunkwan University Department of Medicine

<sup>3</sup>Nune Eye Hospital

\* Both authors are contributed equally to this article as first authors.

\*\*Both authors contributed equally to this article as corresponding authors.

**Representative corresponding author**

Tae-Young Chung

Department of Ophthalmology, Samsung Medical Center, Sungkyunkwan University School of Medicine, #81 Irwon-ro, Gangnam-gu, Seoul 06351, South Korea

[TEL: 02\) 3410-3569](tel:02-3410-3569), FAX: 02) 3410- 0074

E-mail: [tychung@skku.edu](mailto:tychung@skku.edu)

## Appendix

### Figure A1. Postoperative uncorrected near, intermediate, and far visual acuity

(a) Dominant eye. Subgroup analysis showed that at 33cm near distance, the EDOF group had significantly worse monocular visual acuity than the Trifocal group at three months ( $p=0.001$ ). (b) Non-dominant eye. At 43cm near distance, EDOF group had significantly worse monocular visual acuity than the Mix-and-Match group at three months ( $p=0.012$ ).

All outcomes were compared among the three groups. Bonferroni correction for multiple comparisons: significant p-values ( $p < 0.017$ ) in bold with symbols.

\*: Mix and Match vs EDOF   §: Mix and Match vs Trifocal   ¶: EDOF vs Trifocal

### Figure A2. Defocus curves for the three groups

(a) Dominant eye. The Trifocal group had better defocus curve at near distance (-2.0 ~ -4.0D), significantly better at -2.5D ( $p=0.002$  vs Mix-and-Match,  $p=0.001$  vs EDOF) and -3.0D ( $p=0.003$  vs Mix-and-Match,  $p=0.001$  vs EDOF), respectively, at three months ( $p=0.001$ ). (b) Non-dominant eye. Mix-and-Match group showed worse at -1.0D ( $p=0.001$  vs EDOF,  $p=0.009$  vs Trifocal), and EDOF group had significantly lower defocus curve at near distance at three months (-2.5D;  $p<0.001$  vs Trifocal, -3.0D;  $p=0.006$  vs Trifocal).

All outcomes were compared among the three groups. Bonferroni correction for multiple comparisons: significant p-values ( $p < 0.017$ ) in bold with symbols.

\*: Mix and Match vs EDOF   §: Mix and Match vs Trifocal   ¶: EDOF vs Trifocal

## Appendix

<Table>

### Reading speed of the three groups

|                              | Mix-and-Match | EDOF        | Trifocal    |
|------------------------------|---------------|-------------|-------------|
| Mean reading speed (wpm)     | 84.78±17.08   | 68.11±10.02 | 85.12±13.72 |
| Critical print size (logRAD) | 0.29±0.13     | 0.37±0.14   | 0.28±0.14   |
| Threshold size (logRAD)      | 0.14±0.12     | 0.34±0.11   | 0.23±0.08   |

wpm: words per minute, logRAD: logarithm of the reading acuity determination
